# Supplementary material for: Investigating the Biocontrol Potential of the Natural Bacterial Flora of the Apple Blossom
Source: Preprints.org preprint supplement (doi:10.20944/preprints202211.0473.v1), 2022-11-25
Supplement: Supplementary file 1 [file Supplemental Figs.docx]

**Figure S1: Survival curve for *G. mellonella* larvae infected with *P. agglomerans* #378.** Larvae were injected with approximately 5 × 104 bacteria and incubated at 30°C in the dark. Live and dead larvae were counted at 24, 48 and 72 h p.i. Curve represents the mean of three separate experiments. Error bars represent the standard deviation of the data.


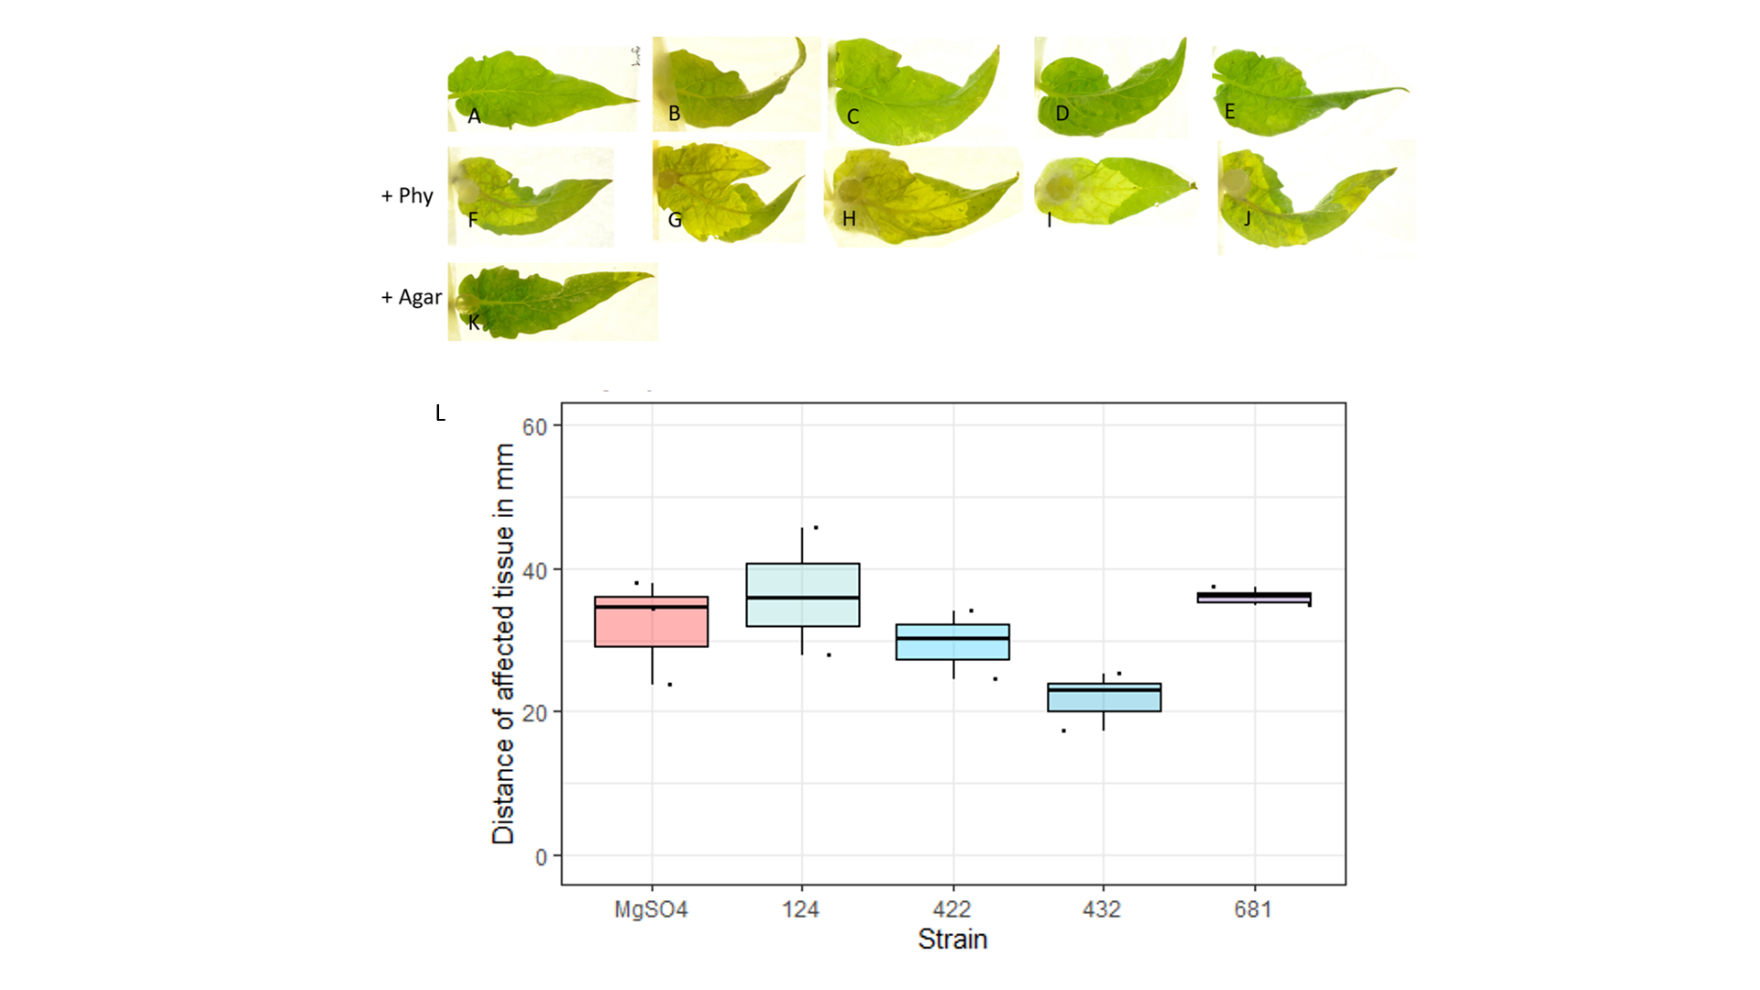


**Figure S2: Tested strains did not inhibit *P. infestans*.** A-K) Tomato leaves sprayed with MgSO4 solution (A,F,K), #124 (B,G), #422 (C,H) , #432 (D,I), #681 (E,J) and inoculated with an agar plug containing *P. infestans* (+Phy) or only agar (+ Agar). The distance of water soaking progression across the leaf was measured and plotted.


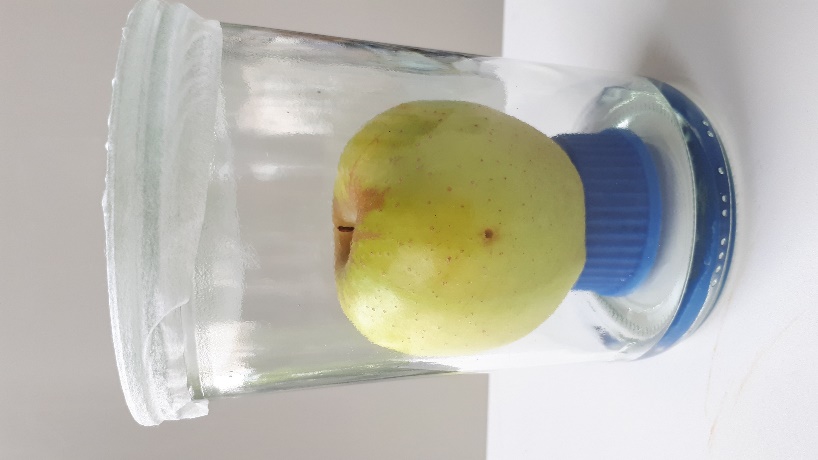


**Figure S3: Apple model for testing activity against *E. amylovora*.** Injected apple before incubation.
